# Supplementary material for: An advanced cell cycle tag toolbox reveals principles underlying temporal control of structure-selective nucleases
Source: eLife journal article supplement (doi:10.7554/elife.52459), 2020-04-30
Supplement: supp [file elife-52459-supp-v2.zip]

Archive with 17 entries (17 files):
- elife_poa_e52459_Transparent_Reporting_File.docx
- elife_poa_e52459_Figure_1_figure_supplement_1.pdf
- elife_poa_e52459_Figure_1_figure_supplement_2.pdf
- elife_poa_e52459_Figure_1_figure_supplement_3.pdf
- elife_poa_e52459_Figure_1_figure_supplement_4.pdf
- elife_poa_e52459_Figure_2_figure_supplement_1.pdf
- elife_poa_e52459_Figure_2_figure_supplement_2.pdf
- elife_poa_e52459_Figure_2_figure_supplement_3.pdf
- elife_poa_e52459_Figure_3_figure_supplement_1.pdf
- elife_poa_e52459_Figure_4_figure_supplement_1.pdf
- elife_poa_e52459_Figure_4_figure_supplement_2.pdf
- elife_poa_e52459_Figure_5_figure_supplement_1.pdf
- elife_poa_e52459_Figure_5_figure_supplement_2.pdf
- elife_poa_e52459_Supplementary_file_1.docx
- elife_poa_e52459_Figure_4_source_data_1.xlsx
- elife_poa_e52459_Figure_4_source_data_2.xlsx
- elife_poa_e52459_Figure_5_source_data_1.xlsx
