# Supplementary material for: An advanced cell cycle tag toolbox reveals principles underlying temporal control of structure-selective nucleases
Source: eLife journal article supplement (doi:10.7554/elife.52459), 2020-04-30
Supplement: supp [file elife-52459-supp-v2.zip › elife_poa_e52459_Figure_4_source_data_1.xlsx]

## Sheet: Average
	Figure 4 - source data 1: average, stdv and p-values of normalized colony numbers from replicates 1-3 depicted in Fig 4A
	WT (yDG208)	1h +MMS	2h +MMS	3h +MMS
	normalized colony number_Replicate 1	0.728406	0.804987	0.621549
	_Replicate 2	1.02362	0.880577	0.906824
	_Replicate 3	0.93314	1.01599	1.01163
	average (Replicate 1-3)	0.895056	0.900517	0.846667
	stdv (Replicate 1-3)	0.151248	0.106905	0.201877
	mus81∆ (yDG335)
	normalized colony number_Replicate 1	0.0776081	0.0101781	0.00127226
	_Replicate 2	0.116216	0.0027027	0
	_Replicate 3	0.112821	0.0290598	0.00854701
	average (Replicate 1-3)	0.102215	0.0139802	0.00327309
	stdv (Replicate 1-3)	0.0213777	0.0135837	0.00461143
	Significance (T-Test) compared to WT	0.0008	0.0001	0.0019
		**	**	**
	Mhigh-Mus81-Mms4 (yJB517)
	normalized colony number_Replicate 1	0.867336	0.787068	0.812709
	_Replicate 2	0.907407	0.969577	0.904762
	_Replicate 3	0.9809	0.918145	0.95498
	average (Replicate 1-3)	0.918548	0.891596	0.890817
	stdv (Replicate 1-3)	0.0575962	0.0941061	0.0721531
	Significance (T-Test) compared to WT	0.8139	0.9188	0.7393
		n.s.	n.s.	n.s.
	Shigh-Mus81-Mms4 (yJB519)
	normalized colony number_Replicate 1	0.427313	0.223568	0.0848018
	_Replicate 2	0.274797	0.0487805	0.0243902
	_Replicate 3	0.399135	0.148415	0.0951009
	average (Replicate 1-3)	0.367082	0.140255	0.0680976
	stdv (Replicate 1-3)	0.0811534	0.0876792	0.0382004
	Significance (T-Test) compared to WT	0.0060	0.0007	0.0028
		*	**	**
	Mlow-Mus81-Mms4 (yJB918)
	normalized colony number_Replicate 1	0.840164	0.622951	0.641393
	_Replicate 2	0.984925	0.956449	0.938023
	_Replicate 3	1.03328	0.966717	0.975794
	average (Replicate 1-3)	0.95279	0.848706	0.851737
	stdv (Replicate 1-3)	0.10049	0.195577	0.183139
	Significance (T-Test) compared to WT	0.6112	0.7078	0.9758
		n.s.	n.s.	n.s.
	Slow-Mus81-Mms4 (yJB941)
	normalized colony number_Replicate 1	0.143406	0.0179257	0.00768246
	_Replicate 2	0.101877	0.0107239	0.00134048
	_Replicate 3	0.165899	0.0430108	0.0138249
	average (Replicate 1-3)	0.13706	0.0238868	0.00761594
	stdv (Replicate 1-3)	0.0324792	0.0169488	0.00624247
	Significance (T-Test) compared to WT	0.0011	0.0001	0.0020
		**	**	**

## Sheet: Replicate_1
	Figure 4A - source data 1: Raw data of Replicate_1
		0h	1h +MMS	2h +MMS	3h +MMS
	WT (yDG208)_number of colonies on _plate 1	248	199	186	159
	_plate 2	303	192	253	168
	_plate 3	304	228	214	165
	_plate4	268	199	251	206
	average (plate_1-_4)	280.75	204.5	226	174.5
	normalized to 0h (/0h)		0.728406	0.804987	0.621549
	mus81∆ (yDG335)_number of colonies on _plate 1	281	11	2	0
	_plate 2	175	18	2	1
	_plate 3	144	19	3	0
	_plate4	186	13	1	0
	average (plate_1-_4)	196.5	15.25	2	0.25
	normalized to 0h (/0h)		0.0776081	0.0101781	0.00127226
	Mhigh-Mus81-Mms4 (yJB517)_number of colonies on _plate 1	236	163	187	177
	_plate 2	282	185	191	165
	_plate 3	213	190	179	187
	_plate4	166	240	149	200
	average (plate_1-_4)	224.25	194.5	176.5	182.25
	normalized to 0h (/0h)		0.867336	0.787068	0.812709
	Shigh-Mus81-Mms4 (yJB519)_number of colonies on _plate 1	211	83	61	16
	_plate 2	223	93	52	16
	_plate 3	247	117	41	20
	_plate4		95	49	25
	average (plate_1-_4)	227	97	50.75	19.25
	normalized to 0h (/0h)		0.427313	0.223568	0.0848018
	Mlow-Mus81-Mms4 (yJB918)_number of colonies on _plate 1	270	190	118	176
	_plate 2	260	239	176	140
	_plate 3	233	190	142	150
	_plate4	213	201	172	160
	average (plate_1-_4)	244	205	152	156.5
	normalized to 0h (/0h)		0.840164	0.622951	0.641393
	Slow-Mus81-Mms4 (yJB941)_number of colonies on _plate 1	190	39	4	6
	_plate 2	149	24	8	0
	_plate 3	199	24	1	0
	_plate4	243	25	1	0
	average (plate_1-_4)	195.25	28	3.5	1.5
	normalized to 0h (/0h)		0.143406	0.0179257	0.00768246

## Sheet: Replicate_2
	Figure 4A - source data 1: Raw data of Replicate_2
		0h	1h +MMS	2h +MMS	3h +MMS
	WT (yDG208)_number of colonies on _plate 1	202	206	160	162
	_plate 2	190	198	169	187
	_plate 3	190	183	178	172
	_plate4	180	193	164	170
	average (plate_1-_4)	190.5	195	167.75	172.75
	normalized to 0h (/0h)		1.02362	0.880577	0.906824
	mus81∆ (yDG335)_number of colonies on _plate 1	210	19	0	0
	_plate 2	201	38	0	0
	_plate 3	159	14	0	0
	_plate4	170	15	2	0
	average (plate_1-_4)	185	21.5	0.5	0
	normalized to 0h (/0h)		0.116216	0.0027027	0
	Mhigh-Mus81-Mms4 (yJB517)_number of colonies on _plate 1	173	177	178	161
	_plate 2	186	188	206	220
	_plate 3	196	150	173	160
	_plate4	201	171	176	143
	average (plate_1-_4)	189	171.5	183.25	171
	normalized to 0h (/0h)		0.907407	0.969577	0.904762
	Shigh-Mus81-Mms4 (yJB519)_number of colonies on _plate 1	177	38	5	3
	_plate 2	155	45	9	3
	_plate 3	138	40	9	6
	_plate4	145	46	7	3
	average (plate_1-_4)	153.75	42.25	7.5	3.75
	normalized to 0h (/0h)		0.274797	0.0487805	0.0243902
	Mlow-Mus81-Mms4 (yJB918)_number of colonies on _plate 1	111	164	106	133
	_plate 2	203	158	167	150
	_plate 3	136	115	155	145
	_plate4	147	151	143	132
	average (plate_1-_4)	149.25	147	142.75	140
	normalized to 0h (/0h)		0.984925	0.956449	0.938023
	Slow-Mus81-Mms4 (yJB941)_number of colonies on _plate 1	244	14	1	0
	_plate 2	185	19	1	0
	_plate 3	160	16	2	1
	_plate4	157	27	4	0
	average (plate_1-_4)	186.5	19	2	0.25
	normalized to 0h (/0h)		0.101877	0.0107239	0.00134048

## Sheet: Replicate_3
	Figure 4A - source data 1: Raw data of Replicate_3
		0h	1h +MMS	2h +MMS	3h +MMS
	WT (yDG208)_number of colonies on _plate 1	156	156	186	186
	_plate 2	172	161	172	177
	_plate 3	165	164	173	151
	_plate4	195	161	168	182
	average (plate_1-_4)	172	160.5	174.75	174
	normalized to 0h (/0h)		0.93314	1.01599	1.01163
	mus81∆ (yDG335)_number of colonies on _plate 1	144	25	4	4
	_plate 2	146	10	5	1
	_plate 3	148	16	4	0
	_plate4	147	15	4	0
	average (plate_1-_4)	146.25	16.5	4.25	1.25
	normalized to 0h (/0h)		0.112821	0.0290598	0.00854701
	Mhigh-Mus81-Mms4 (yJB517)_number of colonies on _plate 1	181	187	169	191
	_plate 2	167	203	172	177
	_plate 3	171	170	151	167
	_plate4	214	159	181	165
	average (plate_1-_4)	183.25	179.75	168.25	175
	normalized to 0h (/0h)		0.9809	0.918145	0.95498
	Shigh-Mus81-Mms4 (yJB519)_number of colonies on _plate 1	196	83	20	15
	_plate 2	167	75	24	19
	_plate 3	153	69	39	16
	_plate4	178	50	20	16
	average (plate_1-_4)	173.5	69.25	25.75	16.5
	normalized to 0h (/0h)		0.399135	0.148415	0.0951009
	Mlow-Mus81-Mms4 (yJB918)_number of colonies on _plate 1	168	142	158	159
	_plate 2	162	178	160	161
	_plate 3	157	186	163	144
	_plate4	174	177	158	181
	average (plate_1-_4)	165.25	170.75	159.75	161.25
	normalized to 0h (/0h)		1.03328	0.966717	0.975794
	Slow-Mus81-Mms4 (yJB941)_number of colonies on _plate 1	145	29	8	2
	_plate 2	171	19	6	3
	_plate 3	163	32	8	2
	_plate4	172	28	6	2
	average (plate_1-_4)	162.75	27	7	2.25
	normalized to 0h (/0h)		0.165899	0.0430108	0.0138249
