# Supplementary material for: An advanced cell cycle tag toolbox reveals principles underlying temporal control of structure-selective nucleases
Source: eLife journal article supplement (doi:10.7554/elife.52459), 2020-04-30
Supplement: supp [file elife-52459-supp-v2.zip › elife_poa_e52459_Figure_4_source_data_2.xlsx]

## Sheet: Sheet1
	Figure 4 - source data 2: average, stdv and p-values of CO rates from two independent experiments depicted in Fig 4D
				CO rates_Replicate 1	_Replicate 2	average (Replicate 1-2)	stdv (Replicate 1-2)		Significance (T-test) compared to WT
	overall		WT (yJB535)	40.8163	43.2432	42.0298	1.71609
			mus81∆ (yJB607)	25.5403	23.2381	24.3892	1.62789		0.0089	*
			Mhigh-Mus81-Mms4 (yJB668)	40.0662	38.6207	39.3435	1.02215		0.1975
			Shigh-Mus81-Mms4 (yJB669)	24.2315	23.0179	23.6247	0.858118		0.0054	*
			Mlow-Mus81-Mms4 (yJB1030)	41.2766	41.8692	41.5729	0.419005		0.7496
			Slow-Mus81-Mms4 (yJB1031)	11.3821	10.5058	10.944	0.619622		0.0017	**
	red/white		WT (yJB535)	50.7937	51.2821	51.0379	0.345351
			mus81∆ (yJB607)	34.0426	33.6	33.8213	0.312932		0.0004	**
			Mhigh-Mus81-Mms4 (yJB668)	45.0262	41.2698	43.148	2.65613		0.0531
			Shigh-Mus81-Mms4 (yJB669)	26.5734	26.3736	26.4735	0.14128		0.0001	**
			Mlow-Mus81-Mms4 (yJB1030)	41.3333	44.3439	42.8386	2.12879		0.0329	*
			Slow-Mus81-Mms4 (yJB1031)	16.2437	13.4969	14.8703	1.94223		0.0015	**
	red		WT (yJB535)	42.5743	44.8845	43.7294	1.63358
			mus81∆ (yJB607)	27.6276	24.3902	26.0089	2.28918		0.0124	*
			Mhigh-Mus81-Mms4 (yJB668)	42.8571	43.8819	43.3695	0.724582		0.8026
			Shigh-Mus81-Mms4 (yJB669)	26.6272	26.383	26.5051	0.172704		0.0045	**
			Mlow-Mus81-Mms4 (yJB1030)	45.3125	45.2675	45.29	0.0318271		0.3093
			Slow-Mus81-Mms4 (yJB1031)	8.72274	9.1954	8.95907	0.334222		0.0011	**
	white		WT (yJB535)	22.4299	19.6721	21.051	1.95004
			mus81∆ (yJB607)	7.31707	8.84956	8.08332	1.08363		0.0145	*
			Mhigh-Mus81-Mms4 (yJB668)	15.5844	16.6667	16.1255	0.765267		0.0798
			Shigh-Mus81-Mms4 (yJB669)	8.33333	6.15385	7.24359	1.54113		0.0158	*
			Mlow-Mus81-Mms4 (yJB1030)	25	22.5352	23.7676	1.74287		0.2796
			Slow-Mus81-Mms4 (yJB1031)	10.3093	8.88889	9.59908	1.00437		0.0179	*
