# Supplementary material for: An advanced cell cycle tag toolbox reveals principles underlying temporal control of structure-selective nucleases
Source: eLife journal article supplement (doi:10.7554/elife.52459), 2020-04-30
Supplement: supp [file elife-52459-supp-v2.zip › elife_poa_e52459_Figure_5_source_data_1.xlsx]

## Sheet: average
	Figure 5 - source data 1: average, stdv and p-values of normalized colony numbers from replicates 1-3 depicted in Fig 5D
	WT (yDG208)	1h +MMS	2h +MMS	3h +MMS
	normalized colony number_Replicate 1	1.13752	1.04924	0.847199
	_Replicate 2	0.993939	0.784848	0.789394
	_Replicate 3	0.804293	0.806818	0.704545
	average (Replicate 1-3)	0.978585	0.880301	0.780379
	stdv (Replicate 1-3)	0.167144	0.146714	0.0717526
	Yen1-ON (yJB548)
	normalized colony number_Replicate 1	0.621622	0.345661	0.263158
	_Replicate 2	0.665693	0.436496	0.332847
	_Replicate 3	0.617232	0.429379	0.288136
	average (Replicate 1-3)	0.634849	0.403845	0.294713
	stdv (Replicate 1-3)	0.0268022	0.0505143	0.035307
	p-value (T-test)	0.0245	0.0060	0.0005
		*	*	**
	Slow-Yen1-ON (yJB775)
	normalized colony number_Replicate 1	0.772194	0.592965	0.39866
	_Replicate 2	0.73931	0.503448	0.34069
	_Replicate 3	0.790179	0.590774	0.470238
	average (Replicate 1-3)	0.767228	0.562396	0.403196
	stdv (Replicate 1-3)	0.0257952	0.0510617	0.0648932
	p-value (T-test)	0.0964	0.0239	0.0025
		n.s.	*	**
	Mlow-Yen1-ON (yJB702)
	normalized colony number_Replicate 1	0.849702	0.75	0.526786
	_Replicate 2	0.674817	0.545232	0.449878
	_Replicate 3	0.615863	0.475894	0.357698
	average (Replicate 1-3)	0.713461	0.590376	0.444787
	stdv (Replicate 1-3)	0.121615	0.14252	0.0846586
	p-value (T-test)	0.0905	0.0701	0.0063
		n.s.	n.s.	*
	G1low-Yen1-ON (yJB1066)
	normalized colony number_Replicate 1	1.07865	0.926164	0.784912
	_Replicate 2	1.05399	0.945183	0.799003
	_Replicate 3	0.994475	0.740331	0.802486
	average (Replicate 1-3)	1.04237	0.870559	0.795467
	stdv (Replicate 1-3)	0.0432737	0.113181	0.0093056
	p-value (T-test)	0.5571	0.9318	0.7362
		n.s.	n.s.	n.s.
	Shigh-Yen1-ON (yJB775)
	normalized colony number_Replicate 1	0.987603	0.479339	0.32438
	_Replicate 2	0.592157	0.407843	0.229412
	_Replicate 3	0.550669	0.304015	0.239006
	average (Replicate 1-3)	0.710143	0.397066	0.264266
	stdv (Replicate 1-3)	0.241181	0.0881572	0.052281
	p-value (T-test)	0.1883	0.0081	0.0005
		n.s.	*	**
	Mhigh-Yen1-ON (yJB702)
	normalized colony number_Replicate 1	0.762712	0.498588	0.396893
	_Replicate 2	0.913189	0.372287	0.288815
	_Replicate 3	0.771167	0.384439	0.281465
	average (Replicate 1-3)	0.815689	0.418438	0.322391
	stdv (Replicate 1-3)	0.0845428	0.069677	0.0646252
	p-value (T-test)	0.2065	0.0079	0.0012
		n.s.	*	**
	G1high-Yen1-ON (yJB1066)
	normalized colony number_Replicate 1	1.04324	0.931532	0.792793
	_Replicate 2	1.13483	1.17528	0.626966
	_Replicate 3	0.625	0.731557	0.737705
	average (Replicate 1-3)	0.934358	0.946123	0.719155
	stdv (Replicate 1-3)	0.271798	0.222221	0.0844553
	p-value (T-test)	0.8221	0.6906	0.3928
		n.s.	n.s.	n.s.

## Sheet: replicate_1
	Figure 5D - source data 1: Raw data of Replicate_1
		0h	1h +MMS	2h +MMS	3h +MMS
	WT (yDG208)_number of colonies on _plate 1	155	217	218	197
	_plate 2	231	226	203	152
	_plate 3	203	227	197	150
	average (plate_1-_3)	196.333	223.333	206	166.333
	normalized to 0h (/0h)		1.13752	1.04924	0.847199
	Yen1-ON (yJB548)_number of colonies on _plate 1	294	143	81	48
	_plate 2	244	167	77	55
	_plate 3	165	127	85	82
	average (plate_1-_3)	234.333	145.667	81	61.6667
	normalized to 0h (/0h)		0.621622	0.345661	0.263158
	Slow-Yen1-ON (yJB775)_number of colonies on _plate 1	201	121	117	85
	_plate 2	176	186	120	81
	_plate 3	220	154	117	72
	average (plate_1-_3)	199	153.667	118	79.3333
	normalized to 0h (/0h)		0.772194	0.592965	0.39866
	Mlow-Yen1-ON (yJB702)_number of colonies on _plate 1	216	199	158	113
	_plate 2	201	178	175	129
	_plate 3	255	194	171	112
	average (plate_1-_3)	224	190.333	168	118
	normalized to 0h (/0h)		0.849702	0.75	0.526786
	G1low-Yen1-ON (yJB1066)_number of colonies on _plate 1	193	199	197	152
	_plate 2	177	217	201	176
	_plate 3	253	256	179	161
	average (plate_1-_3)	207.667	224	192.333	163
	normalized to 0h (/0h)		1.07865	0.926164	0.784912
	Shigh-Yen1-ON (yJB775)_number of colonies on _plate 1	200	140	71	49
	_plate 2	140	177	76	63
	_plate 3	144	161	85	45
	average (plate_1-_3)	161.333	159.333	77.3333	52.3333
	normalized to 0h (/0h)		0.987603	0.479339	0.32438
	Mhigh-Yen1-ON (yJB702)_number of colonies on _plate 1	243	139	122	97
	_plate 2	206	203	128	89
	_plate 3	259	198	103	95
	average (plate_1-_3)	236	180	117.667	93.6667
	normalized to 0h (/0h)		0.762712	0.498588	0.396893
	G1high-Yen1-ON (yJB1066))_number of colonies on _plate 1	181	173	148	140
	_plate 2	143	220	186	140
	_plate 3	231	186	183	160
	average (plate_1-_3)	185	193	172.333	146.667
	normalized to 0h (/0h)		1.04324	0.931532	0.792793

## Sheet: replicate_2
	Figure 5D - source data 1: Raw data of Replicate_3
		0h	1h +MMS	2h +MMS	3h +MMS
	WT (yDG208)_number of colonies on _plate 1	189	216	177	160
	_plate 2	250	232	154	195
	_plate 3	221	208	187	166
	average (plate_1-_3)	220	218.667	172.667	173.667
	normalized to 0h (/0h)		0.993939	0.784848	0.789394
	Yen1-ON (yJB548)_number of colonies on _plate 1	215	165	84	86
	_plate 2	225	144	106	73
	_plate 3	245	147	109	69
	average (plate_1-_3)	228.333	152	99.6667	76
	normalized to 0h (/0h)		0.665693	0.436496	0.332847
	Slow-Yen1-ON (yJB775)_number of colonies on _plate 1	268	166	107	84
	_plate 2	205	176	135	87
	_plate 3	252	194	123	76
	average (plate_1-_3)	241.667	178.667	121.667	82.3333
	normalized to 0h (/0h)		0.73931	0.503448	0.34069
	Mlow-Yen1-ON (yJB702)_number of colonies on _plate 1	233	161	157	116
	_plate 2	291	222	181	137
	_plate 3	294	169	108	115
	average (plate_1-_3)	272.667	184	148.667	122.667
	normalized to 0h (/0h)		0.674817	0.545232	0.449878
	G1low-Yen1-ON (yJB1066)_number of colonies on _plate 1	161	222	190	144
	_plate 2	195	201	188	199
	_plate 3	246		191	138
	average (plate_1-_3)	200.667	211.5	189.667	160.333
	normalized to 0h (/0h)		1.05399	0.945183	0.799003
	Shigh-Yen1-ON (yJB775)_number of colonies on _plate 1	171	94	62	41
	_plate 2	187	104	81	44
	_plate 3	152	104	65	32
	average (plate_1-_3)	170	100.667	69.3333	39
	normalized to 0h (/0h)		0.592157	0.407843	0.229412
	Mhigh-Yen1-ON (yJB702)_number of colonies on _plate 1	174	170	69	53
	_plate 2	264	180	80	61
	_plate 3	161	197	74	59
	average (plate_1-_3)	199.667	182.333	74.3333	57.6667
	normalized to 0h (/0h)		0.913189	0.372287	0.288815
	G1high-Yen1-ON (yJB1066))_number of colonies on _plate 1	138	162	166	82
	_plate 2	185	182	163	96
	_plate 3	122	161	194	101
	average (plate_1-_3)	148.333	168.333	174.333	93
	normalized to 0h (/0h)		1.13483	1.17528	0.626966

## Sheet: replicate_3
	Figure 5D - source data 1: Raw data of Replicate_2
		0h	1h +MMS	2h +MMS	3h +MMS
	WT (yDG208)_number of colonies on _plate 1	269	201	182	218
	_plate 2	327	222	238	141
	_plate 3	196	214	219	199
	average (plate_1-_3)	264	212.333	213	186
	normalized to 0h (/0h)		0.804293	0.806818	0.704545
	Yen1-ON (yJB548)_number of colonies on _plate 1	225	148	96	63
	_plate 2	205	143	101	65
	_plate 3	278	146	107	76
	average (plate_1-_3)	236	145.667	101.333	68
	normalized to 0h (/0h)		0.617232	0.429379	0.288136
	Slow-Yen1-ON (yJB775)_number of colonies on _plate 1	224	192	149	110
	_plate 2	240	146	121	92
	_plate 3	208	193	127	114
	average (plate_1-_3)	224	177	132.333	105.333
	normalized to 0h (/0h)		0.790179	0.590774	0.470238
	Mlow-Yen1-ON (yJB702)_number of colonies on _plate 1	239	103	105	79
	_plate 2	200	147	114	73
	_plate 3	204	146	87	78
	average (plate_1-_3)	214.333	132	102	76.6667
	normalized to 0h (/0h)		0.615863	0.475894	0.357698
	G1low-Yen1-ON (yJB1066)_number of colonies on _plate 1	291	272	168	200
	_plate 2	199	241	180	204
	_plate 3	234	207	188	177
	average (plate_1-_3)	241.333	240	178.667	193.667
	normalized to 0h (/0h)		0.994475	0.740331	0.802486
	Shigh-Yen1-ON (yJB775)_number of colonies on _plate 1	187	98	48	42
	_plate 2	194	89	58	39
	_plate 3	142	101	53	44
	average (plate_1-_3)	174.333	96	53	41.6667
	normalized to 0h (/0h)		0.550669	0.304015	0.239006
	Mhigh-Yen1-ON (yJB702)_number of colonies on _plate 1	125	78	57	38
	_plate 2	176	131	60	43
	_plate 3	136	128	51	42
	average (plate_1-_3)	145.667	112.333	56	41
	normalized to 0h (/0h)		0.771167	0.384439	0.281465
	G1high-Yen1-ON (yJB1066))_number of colonies on _plate 1	190	110	120	130
	_plate 2	176	103	108	114
	_plate 3	122	92	129	116
	average (plate_1-_3)	162.667	101.667	119	120
	normalized to 0h (/0h)		0.625	0.731557	0.737705
