# Supplementary material for: An advanced cell cycle tag toolbox reveals principles underlying temporal control of structure-selective nucleases
Source: eLife journal article supplement (doi:10.7554/elife.52459), 2020-04-30
Supplement: supp [file elife_poa_e52459_Figure_2_figure_supplement_1.pdf › elife_poa_e52459_Figure_2_figure_supplement_1.pdf]

Bittmann\_Figure 2 - supplement 1

A

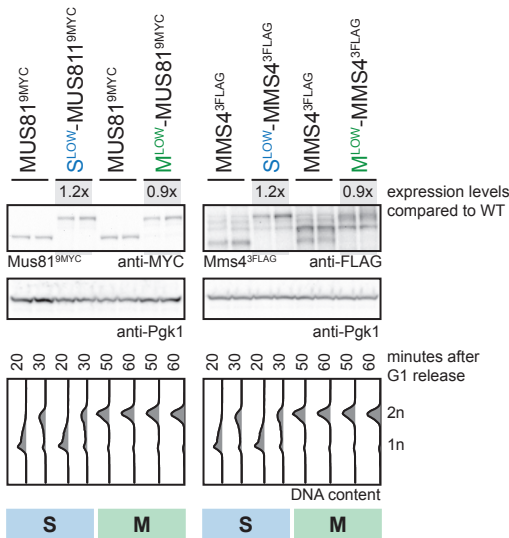

B

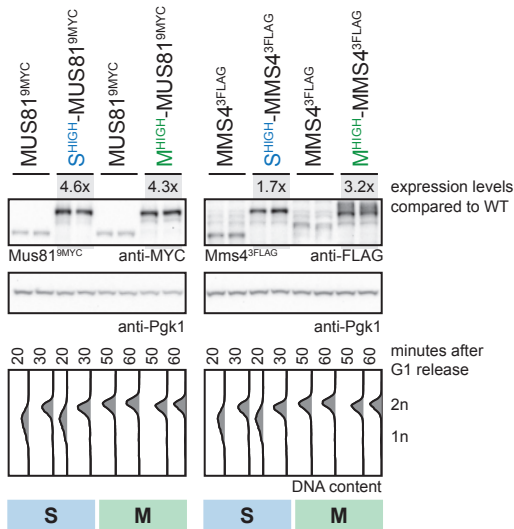

C

Mms4

| tested M-tagged constructs   | peak expression compared to wt | tested S-tagged constructs   | peak expression compared to wt |
|------------------------------|--------------------------------|------------------------------|--------------------------------|
| Cib2 <sup>pCib2</sup>        | +(+)                           | Cib6 <sup>pCib6</sup>        | +(+)                           |
| Cib2 <sup>pCib1</sup>        | +                              | Cib6 <sup>pCib5</sup>        | +                              |
| Cib2 <sup>pCib1 -150bp</sup> | =                              | Cib6 <sup>pCib6 -80bp</sup>  | =                              |
| Cib2 <sup>pCib2 -60bp</sup>  | (+)                            | Cib6 <sup>pCib6 -100bp</sup> | -                              |

Mus81

| tested M-tagged constructs   | peak expression compared to wt | tested S-tagged constructs   | peak expression compared to wt |
|------------------------------|--------------------------------|------------------------------|--------------------------------|
| Cib2 <sup>pCib2</sup>        | ++                             | Cib6 <sup>pCib6</sup>        | +(+)                           |
| Cib2 <sup>pCib1</sup>        | +                              | Cib6 <sup>pCib5</sup>        | +                              |
| Cib2 <sup>pCib1 -150bp</sup> | = (+)                          | Cib6 <sup>pCib6 -80bp</sup>  | =                              |
| Cib2 <sup>pCib2 -60bp</sup>  | +                              | Cib6 <sup>pCib6 -100bp</sup> | -                              |
