# Supplementary material for: An advanced cell cycle tag toolbox reveals principles underlying temporal control of structure-selective nucleases
Source: eLife journal article supplement (doi:10.7554/elife.52459), 2020-04-30
Supplement: supp [file elife_poa_e52459_Figure_4_figure_supplement_1.pdf › elife_poa_e52459_Figure_4_figure_supplement_1.pdf]

# Bittmann\_Figure 4 - supplement 1

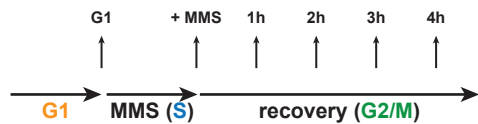

**WT-  
MUS81-MMS4**

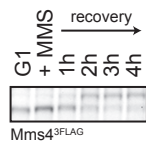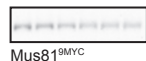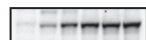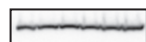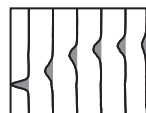

**G1 S M**

**S<sup>LOW</sup>-  
MUS81-MMS4**

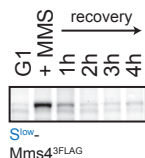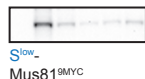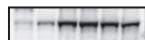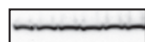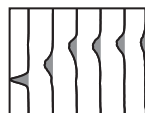

**G1 S M**

**M<sup>LOW</sup>-  
MUS81-MMS4**

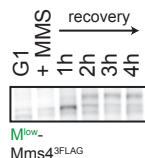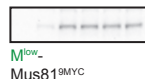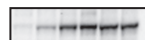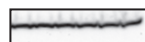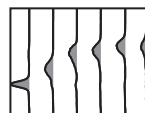

**G1 S M**

**S<sup>HIGH</sup>-  
MUS81-MMS4**

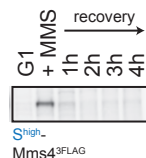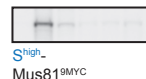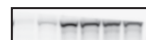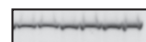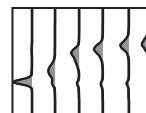

**G1 S M**

**M<sup>HIGH</sup>-  
MUS81-MMS4**

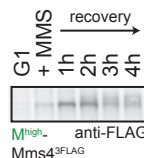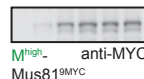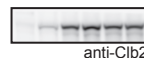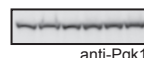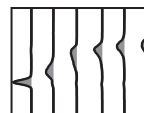

**G1 S M**

2n  
1n

DNA content
