# Supplementary material for: An advanced cell cycle tag toolbox reveals principles underlying temporal control of structure-selective nucleases
Source: eLife journal article supplement (doi:10.7554/elife.52459), 2020-04-30
Supplement: supp [file elife_poa_e52459_Figure_5_figure_supplement_2.pdf › elife_poa_e52459_Figure_5_figure_supplement_2.pdf]

Bittmann\_Figure 5 - supplement 2

A

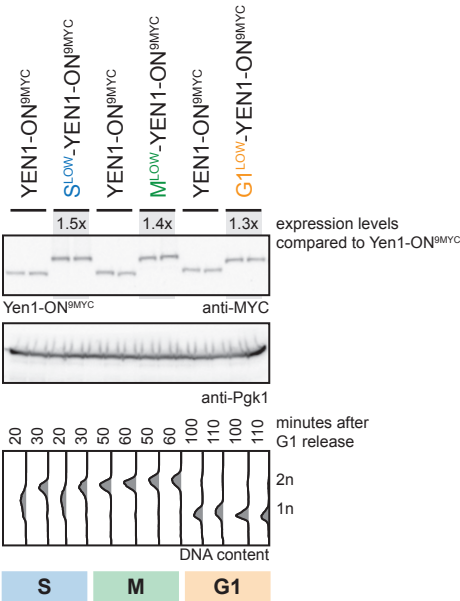

B

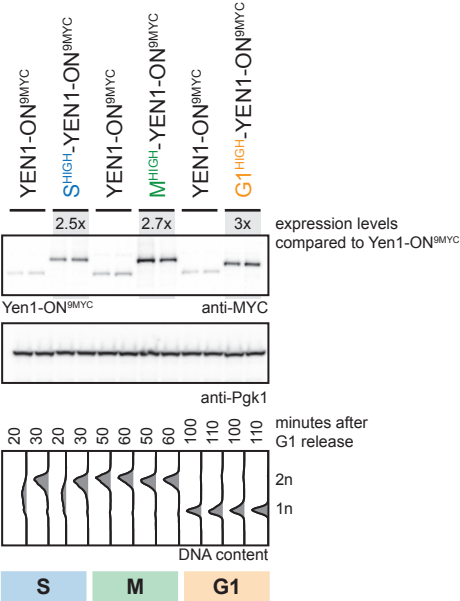

C

| tested M-tagged constructs   | peak expression compared to wt | tested S-tagged constructs  | peak expression compared to wt | tested G1-tagged constructs     | peak expression compared to wt |      |
|------------------------------|--------------------------------|-----------------------------|--------------------------------|---------------------------------|--------------------------------|------|
| Clb2 <sup>pClb2</sup>        | ++                             | Clb6 <sup>pClb5</sup>       | +                              | Sic1 <sup>pSic1</sup>           | ++(+)                          |      |
| Clb1 <sup>pClb2</sup>        | +                              | Clb6 <sup>pClb6</sup>       | +                              | Sic1 <sup>pSic1 -20bp</sup>     | +(+)                           | High |
| Clb2 <sup>pClb2 -40bp</sup>  | +                              | Clb6 <sup>pClb6 -40bp</sup> | -                              | Sic1 <sup>pSic1 -40bp</sup>     | +(+)                           |      |
| Clb1 <sup>pClb1 -150bp</sup> | =                              | Clb6 <sup>pClb6 -60bp</sup> | +                              | Sic1 <sup>pSic1 u(CTA)AUG</sup> | =(+)                           |      |
| Clb2 <sup>pClb2 -60bp</sup>  | =                              | Clb6 <sup>pClb6 -80bp</sup> | =                              | Sic1 <sup>pSic1 u(ATA)AUG</sup> | =                              | Low  |
