# Supplementary figures and images for: An advanced cell cycle tag toolbox reveals principles underlying temporal control of structure-selective nucleases
Source: eLife journal article supplement (doi:10.7554/elife.52459), 2020-04-30

Bittmann\_Figure 1 - supplement 1

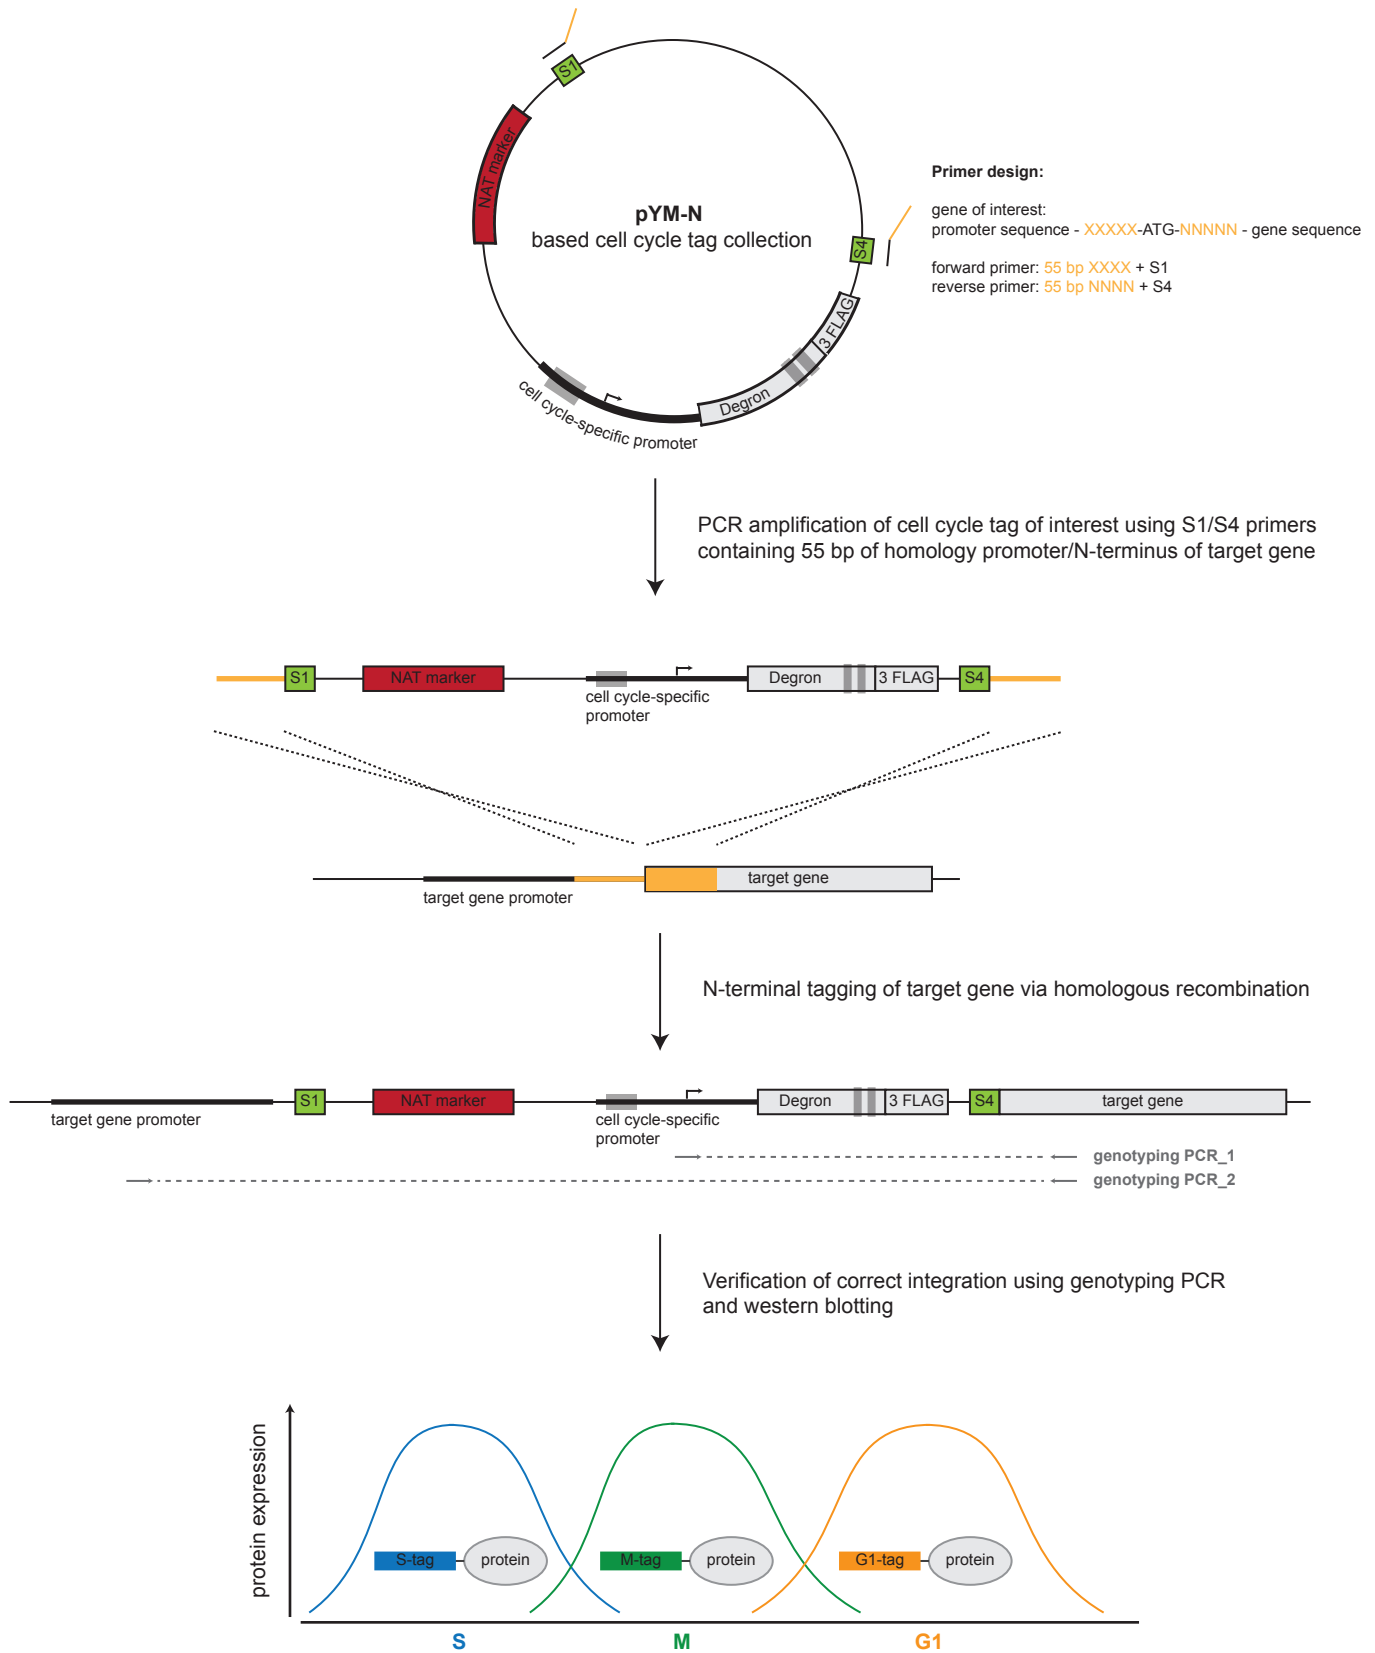

Supplement: supp [file elife_poa_e52459_Figure_1_figure_supplement_1.pdf › elife_poa_e52459_Figure_1_figure_supplement_1.pdf]

Bittmann\_Figure 1 - supplement 2

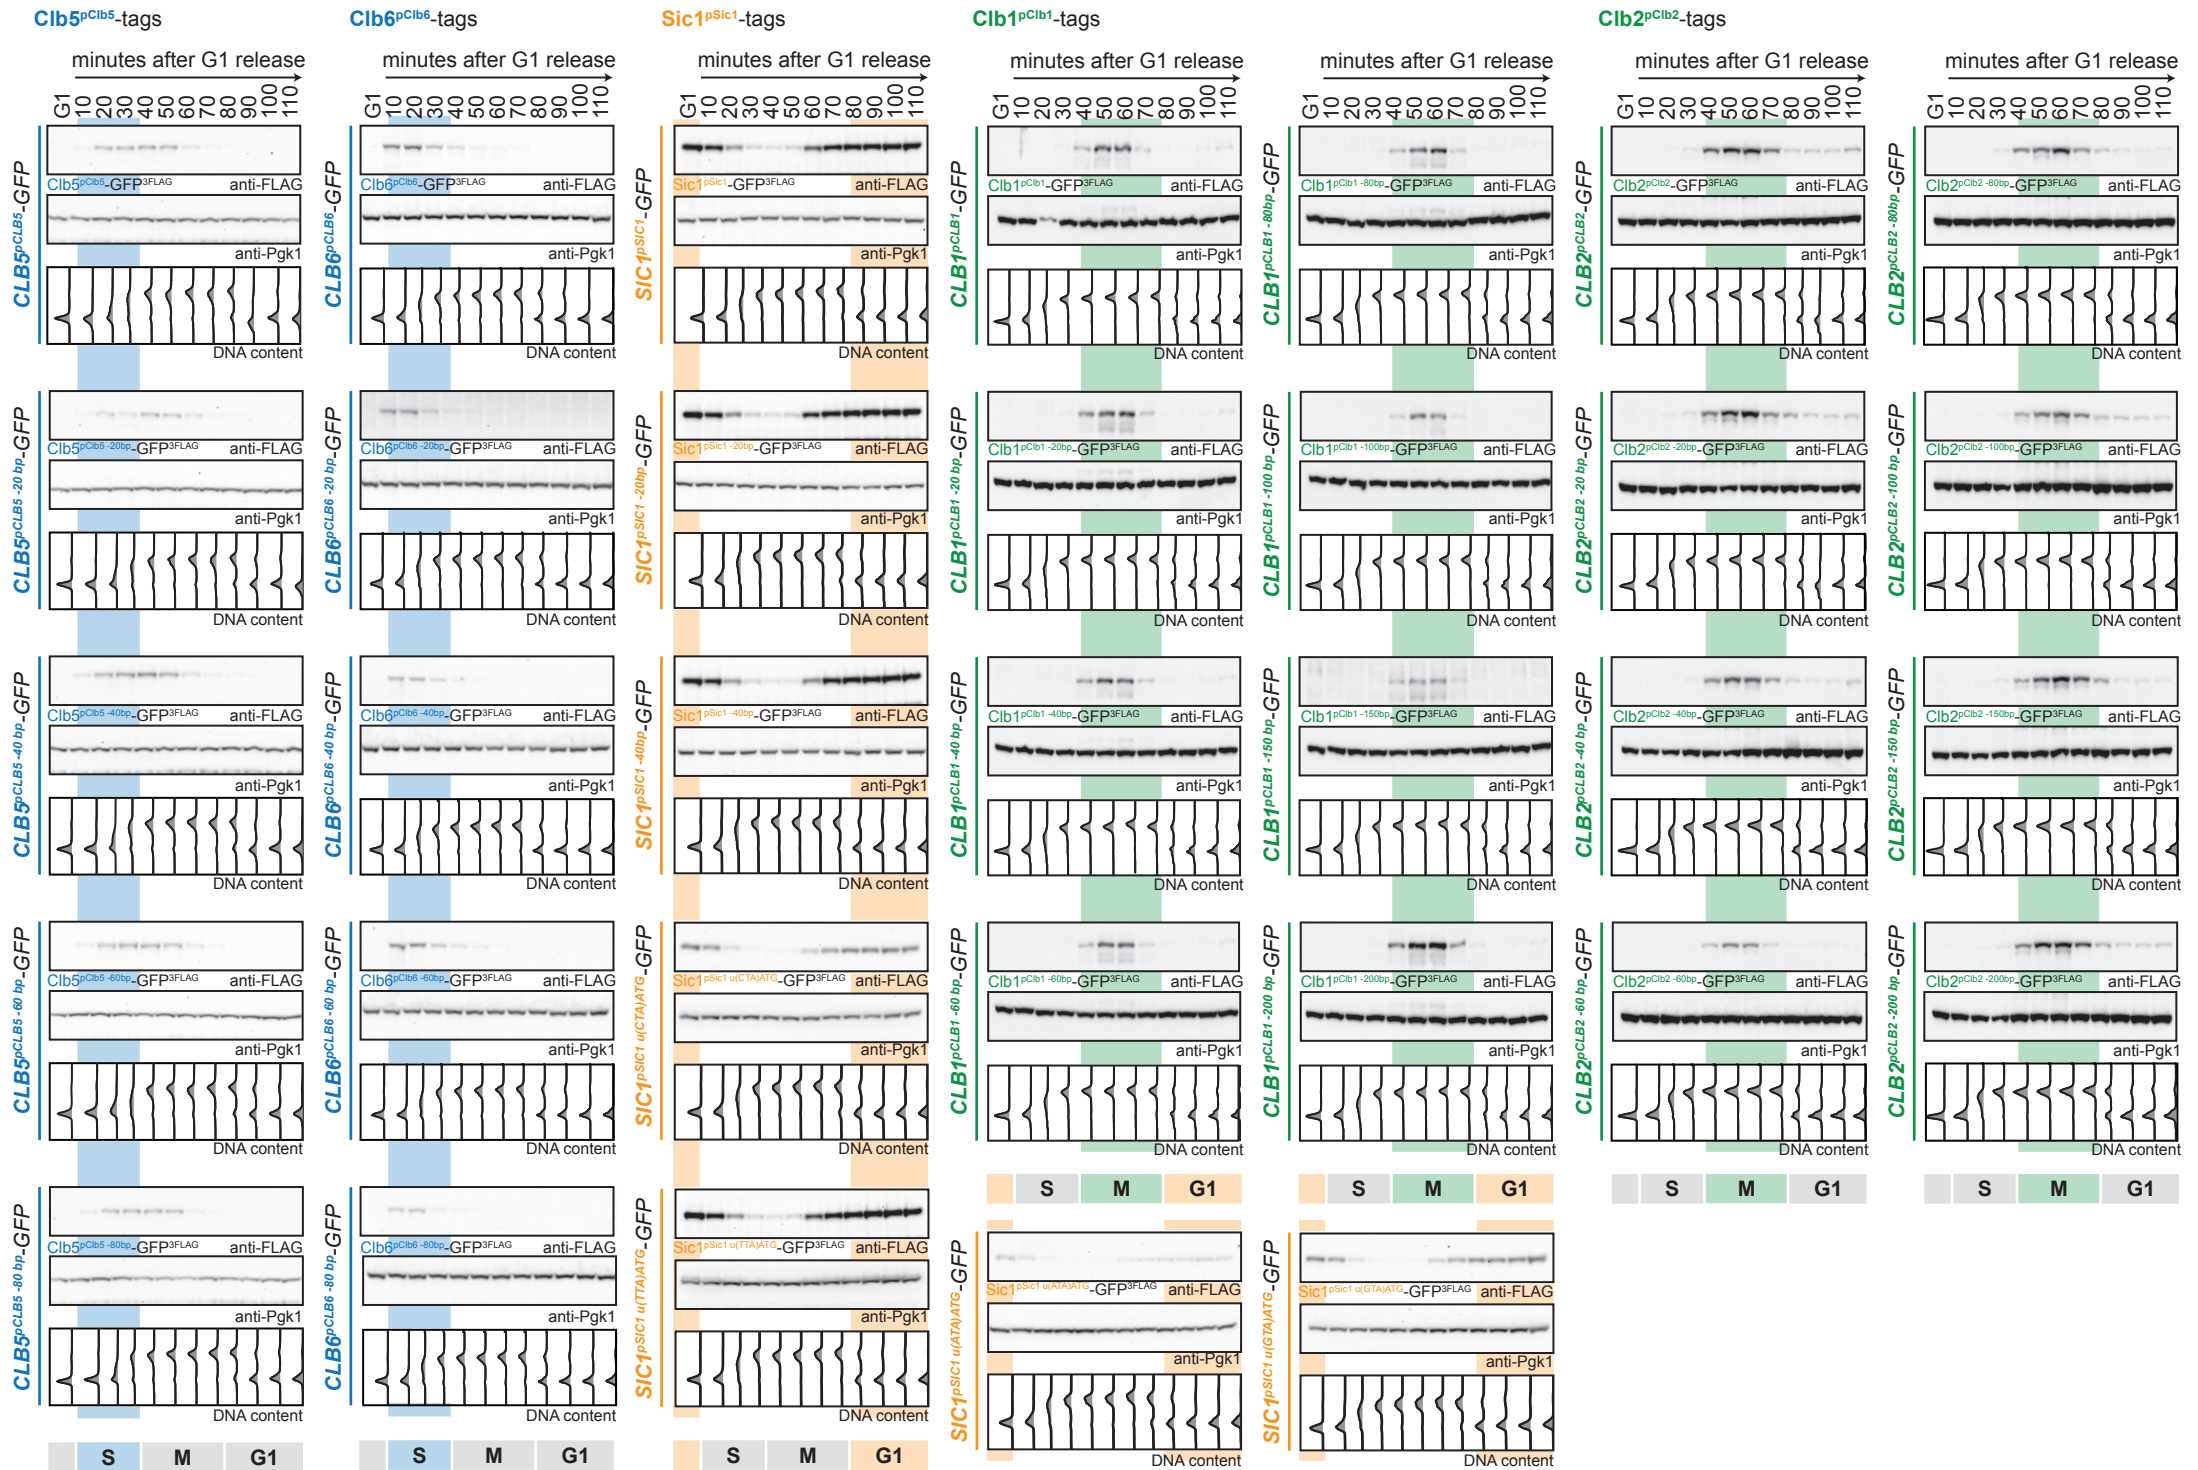

Supplement: supp [file elife_poa_e52459_Figure_1_figure_supplement_2.pdf › elife_poa_e52459_Figure_1_figure_supplement_2.pdf]

# Bittmann\_Figure 1 - supplement 3

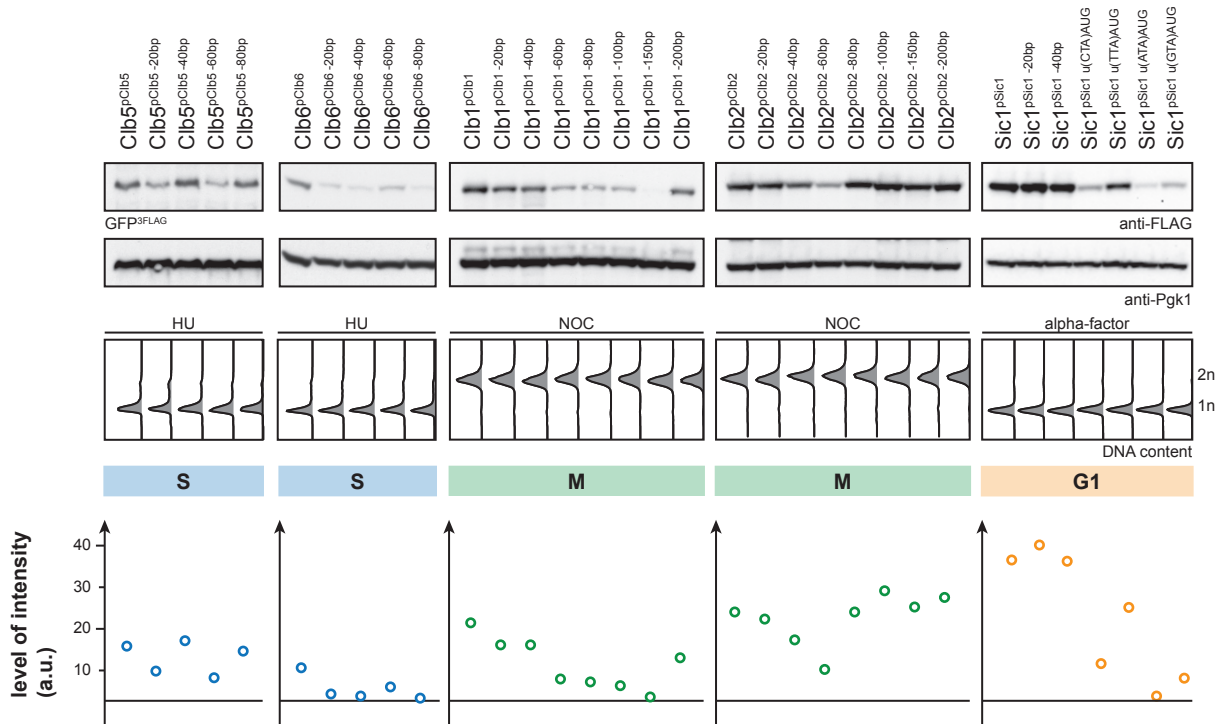

Supplement: supp [file elife_poa_e52459_Figure_1_figure_supplement_3.pdf › elife_poa_e52459_Figure_1_figure_supplement_3.pdf]

# Bittmann\_Figure 1 - supplement 4

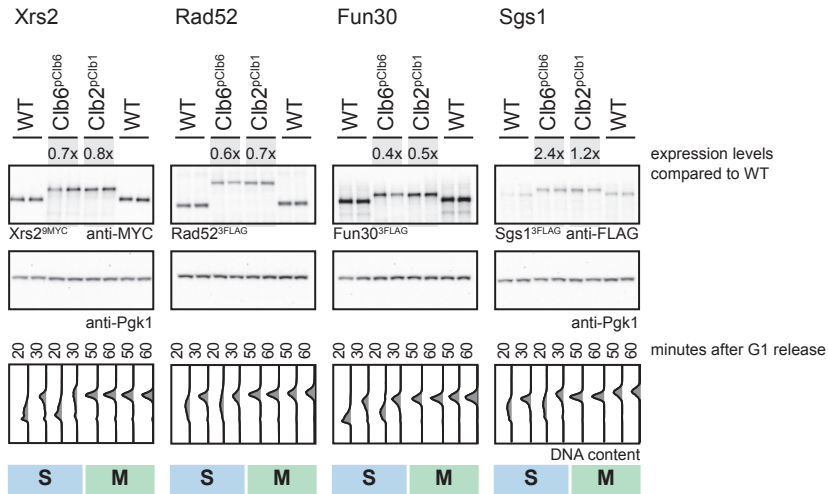

Supplement: supp [file elife_poa_e52459_Figure_1_figure_supplement_4.pdf › elife_poa_e52459_Figure_1_figure_supplement_4.pdf]

# Bittmann\_Figure 2 - supplement 2

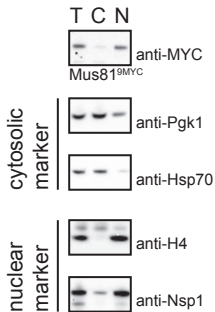

Supplement: supp [file elife_poa_e52459_Figure_2_figure_supplement_2.pdf › elife_poa_e52459_Figure_2_figure_supplement_2.pdf]

# Bittmann\_Figure 2 - supplement 3

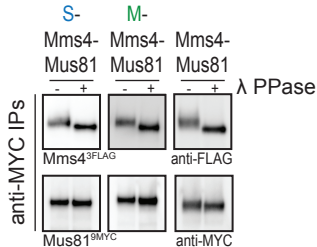

Supplement: supp [file elife_poa_e52459_Figure_2_figure_supplement_3.pdf › elife_poa_e52459_Figure_2_figure_supplement_3.pdf]

A

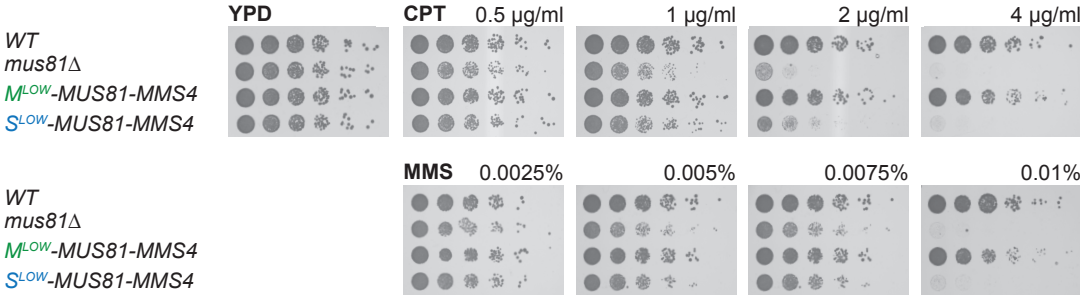

B

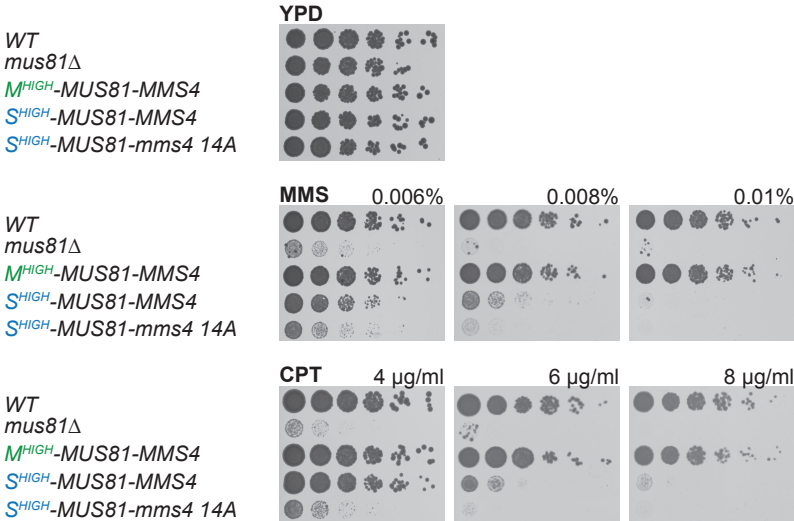

C

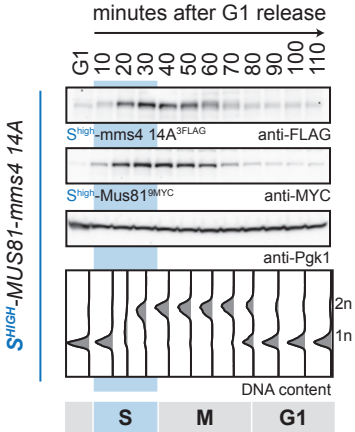

D

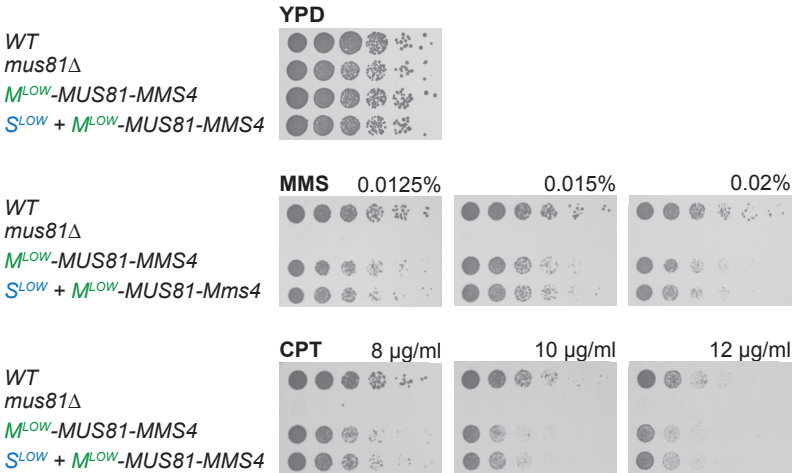

E

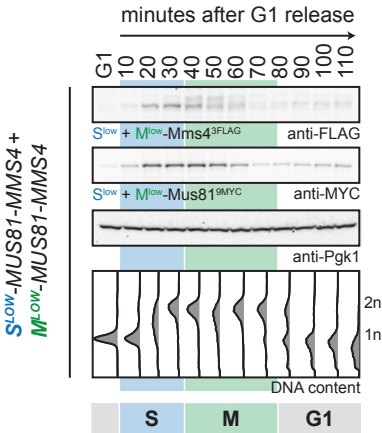

Supplement: supp [file elife_poa_e52459_Figure_3_figure_supplement_1.pdf › elife_poa_e52459_Figure_3_figure_supplement_1.pdf]

# Bittmann\_Figure 4 - supplement 2

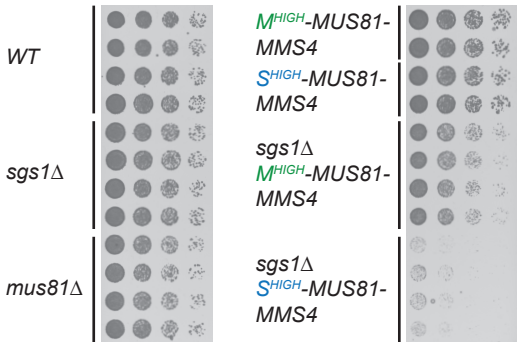

Supplement: supp [file elife_poa_e52459_Figure_4_figure_supplement_2.pdf › elife_poa_e52459_Figure_4_figure_supplement_2.pdf]

Bittmann\_Figure 5 - supplement 1

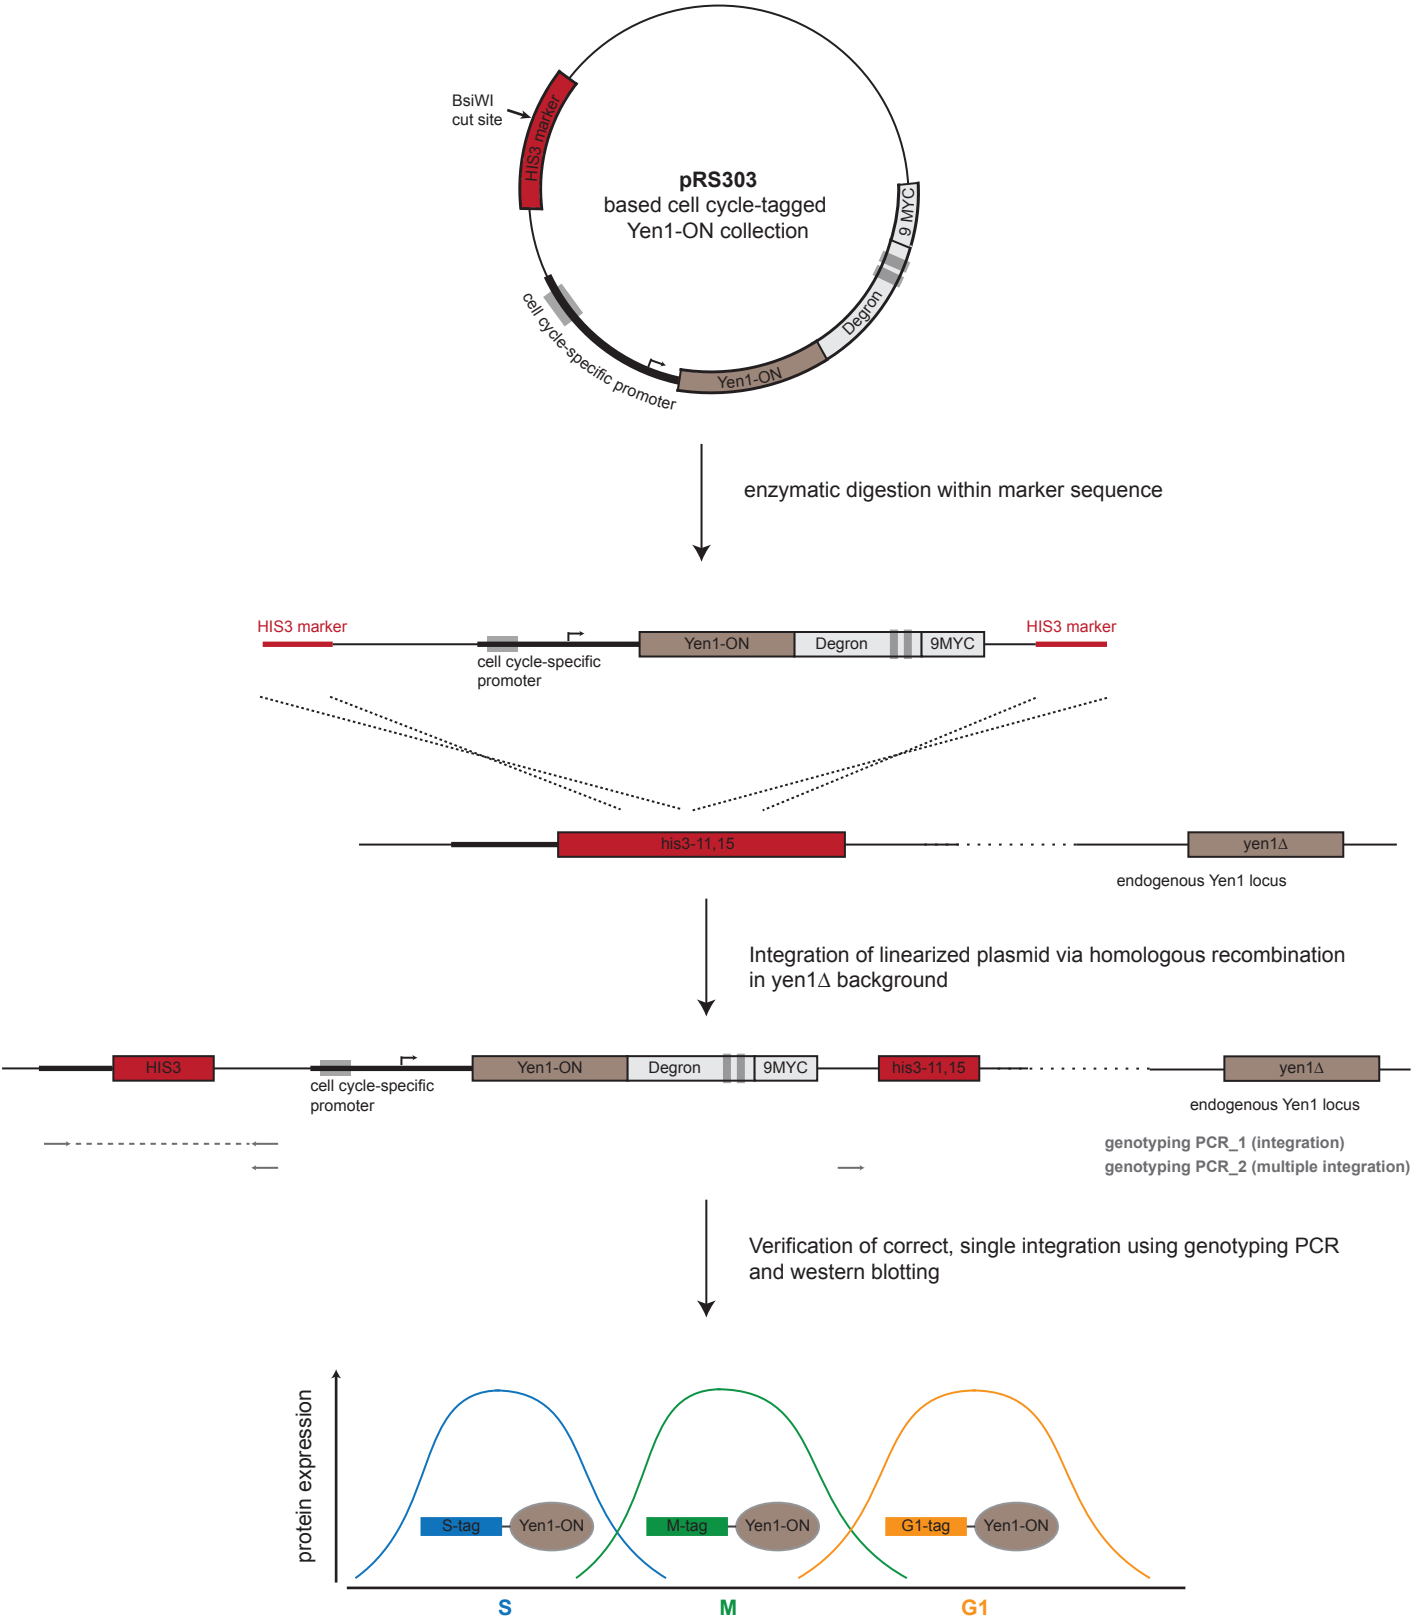

Supplement: supp [file elife_poa_e52459_Figure_5_figure_supplement_1.pdf › elife_poa_e52459_Figure_5_figure_supplement_1.pdf]
